# Supplementary material for: Metabolomic signature of mouse cerebral cortex following Toxoplasma gondii infection
Source: PubMed Central journal article supplement (PMC6664753; doi:10.1186/s13071-019-3623-4), 2019-07-29
Supplement: 13071_2019_3623_MOESM2_ESM.pdf [file 13071_2019_3623_MOESM2_ESM.pdf]

**Additional file 2: Table S1 Differentially abundant metabolites mapped to KEGG pathways.**

| Description *                                                 | Ratio    | <i>P</i> value of <i>t</i> -test | VIP      | m.z      | Retention.time.min. | Pathway                                                                                                                                           |
|---------------------------------------------------------------|----------|----------------------------------|----------|----------|---------------------|---------------------------------------------------------------------------------------------------------------------------------------------------|
| <b>7 dpi NEG</b>                                              |          |                                  |          |          |                     |                                                                                                                                                   |
| 4,5-Dihydroxyphthalate                                        | 1.627988 | 0.023925                         | 1.469355 | 232.9855 | 0.519033            | Metabolic pathways                                                                                                                                |
| 13(1)-Hydroxy-magnesium-protoporphyrin IX 13-monomethyl ester | 0.621275 | 0.047102                         | 1.5604   | 649.2038 | 10.0284             | Porphyrin and chlorophyll metabolism                                                                                                              |
| Icosenoic acid                                                | 0.384702 | 0.040767                         | 2.474858 | 309.2794 | 10.44915            | Biosynthesis of unsaturated fatty acids                                                                                                           |
| 1-Acyl-sn-glycero-3-phosphocholine                            | 1.623334 | 0.037207                         | 1.433007 | 606.3297 | 9.693367            | Glycerophospholipid metabolism; Choline metabolism in cancer                                                                                      |
| Catharanthine                                                 | 0.809691 | 0.046837                         | 1.034806 | 371.1535 | 9.850517            | Metabolic pathways                                                                                                                                |
| 2'-N-Acetylparomamine                                         | 0.695127 | 0.007028                         | 1.493083 | 400.1503 | 9.956967            | Butirosin and neomycin biosynthesis                                                                                                               |
| Heme                                                          | 0.778691 | 0.040871                         | 1.202707 | 615.1703 | 9.97125             | Porphyrin and chlorophyll metabolism                                                                                                              |
| <b>7 dpi POS</b>                                              |          |                                  |          |          |                     |                                                                                                                                                   |
| 2,4-Dichlorobenzoate                                          | 0.763986 | 0.029192                         | 1.310524 | 172.9543 | 0.619033            | Metabolic pathways                                                                                                                                |
| Glycolaldehyde                                                | 1.39997  | 0.038267                         | 1.751688 | 98.98437 | 0.7112              | Pentose and glucuronate interconversions; Glyoxylate and dicarboxylate metabolism; Vitamin B6 metabolism; Folate biosynthesis; Metabolic pathways |
| Methylimidazoleacetic acid                                    | 1.418866 | 0.028573                         | 1.57542  | 123.0555 | 0.768333            | Histidine metabolism                                                                                                                              |
| PE(14:0/22:6(4Z,7Z,10Z,13Z,16Z,19Z))                          | 1.214774 | 0.031813                         | 1.609063 | 774.4436 | 10.38147            | Glycosylphosphatidylinositol(GPI)-anchor biosynthesis; Glycerophospholipid metabolism; Metabolic pathways; Regulation of                          |

|                                       |          |          |          |          |          |                                                                                                                                                                                                                                   |
|---------------------------------------|----------|----------|----------|----------|----------|-----------------------------------------------------------------------------------------------------------------------------------------------------------------------------------------------------------------------------------|
| PE(22:1(13Z)/20:5(5Z,8Z,11Z,14Z,17Z)) | 1.844053 | 0.03692  | 2.146698 | 842.5679 | 10.52432 | autophagy; Retrograde endocannabinoid signaling<br>Glycosylphosphatidylinositol(GPI)-anchor biosynthesis;<br>Glycerophospholipid metabolism;<br>Metabolic pathways; Regulation of autophagy; Retrograde endocannabinoid signaling |
| 7a-Hydroxy-cholestene-3-one           | 0.633277 | 0.036309 | 2.703883 | 418.3695 | 10.62433 | Primary bile acid biosynthesis;<br>Metabolic pathways                                                                                                                                                                             |
| 20alpha,22beta-Dihydroxycholesterol   | 1.297128 | 0.049305 | 1.445506 | 401.3408 | 10.64505 | Steroid hormone biosynthesis;<br>Metabolic pathways                                                                                                                                                                               |
| PE(15:0/18:4(6Z,9Z,12Z,15Z))          | 1.240885 | 0.031949 | 1.481116 | 715.4981 | 10.85935 | Glycosylphosphatidylinositol(GPI)-anchor biosynthesis;<br>Glycerophospholipid metabolism;<br>Metabolic pathways; Regulation of autophagy; Retrograde endocannabinoid signaling                                                    |
| PC(20:3(5Z,8Z,11Z)/14:0)              | 1.489598 | 0.022003 | 2.127636 | 778.5368 | 11.08008 | Glycerophospholipid metabolism;<br>Arachidonic acid metabolism;<br>Linoleic acid metabolism; alpha-Linolenic acid metabolism;<br>Metabolic pathways; Retrograde endocannabinoid signaling; Choline metabolism in cancer           |
| PC(18:1(11Z)/16:0)                    | 1.362562 | 0.036783 | 1.85845  | 760.5847 | 11.9316  | Glycerophospholipid metabolism;<br>Arachidonic acid metabolism;                                                                                                                                                                   |

|                                  |          |          |          |          |          |                                                                                                                                                                          |
|----------------------------------|----------|----------|----------|----------|----------|--------------------------------------------------------------------------------------------------------------------------------------------------------------------------|
|                                  |          |          |          |          |          | Linoleic acid metabolism; alpha-Linolenic acid metabolism; Metabolic pathways; Retrograde endocannabinoid signaling; Choline metabolism in cancer                        |
| Dodecanoic acid                  | 1.893665 | 0.018439 | 2.594525 | 218.2118 | 5.4237   | Fatty acid biosynthesis; Metabolic pathways                                                                                                                              |
| 16-Hydroxypalmitate              | 1.842528 | 0.032996 | 2.798105 | 290.269  | 6.285933 | Metabolic pathways                                                                                                                                                       |
| Calcidiol                        | 1.436363 | 0.032356 | 1.541254 | 383.3292 | 9.210067 | Steroid biosynthesis; Metabolic pathways Tuberculosis                                                                                                                    |
| beta-D-3-Ribofuranosyluric acid  | 0.769    | 0.025819 | 1.756768 | 301.0756 | 9.589117 | Purine metabolism                                                                                                                                                        |
| Chitobiose                       | 0.604085 | 0.035142 | 2.334956 | 449.1373 | 9.624767 | Amino sugar and nucleotide sugar metabolism; Metabolic pathways; ABC transporters                                                                                        |
| <b>14 dpi NEG</b>                |          |          |          |          |          |                                                                                                                                                                          |
| PE(20:5(5Z,8Z,11Z,14Z,17Z)/16:0) | 0.519879 | 0.006903 | 2.94358  | 736.4946 | 11.2335  | Glycosylphosphatidylinositol(GPI)-anchor biosynthesis; Glycerophospholipid metabolism; Metabolic pathways; Regulation of autophagy; Retrograde endocannabinoid signaling |
| Galactosylsphingosine            | 2.744695 | 0.002289 | 3.684009 | 460.3277 | 7.768917 | Sphingolipid metabolism                                                                                                                                                  |
| Arachidonate                     | 2.394818 | 0.000211 | 3.839212 | 303.2325 | 8.003933 | Arachidonic acid metabolism; Linoleic acid metabolism; Biosynthesis of unsaturated fatty acids; Metabolic pathways; Vascular smooth muscle contraction; Platelet         |

|                                    |          |          |          |          |          |                                                                                                                                                                                                                                                                                                                                                                                                       |
|------------------------------------|----------|----------|----------|----------|----------|-------------------------------------------------------------------------------------------------------------------------------------------------------------------------------------------------------------------------------------------------------------------------------------------------------------------------------------------------------------------------------------------------------|
|                                    |          |          |          |          |          | activation; Fc epsilon RI signaling pathway; Fc gamma R-mediated phagocytosis; Retrograde endocannabinoid signaling; Serotonergic synapse; Long-term depression; Inflammatory mediator regulation of TRP channels; GnRH signaling pathway; Ovarian steroidogenesis; Oxytocin signaling pathway; Regulation of lipolysis in adipocytes; Aldosterone synthesis and secretion; Leishmaniasis; Amoebiasis |
| Docosahexaenoic acid               | 1.871345 | 0.038729 | 2.801723 | 327.23   | 8.003933 | Biosynthesis of unsaturated fatty acids                                                                                                                                                                                                                                                                                                                                                               |
| 1-Acyl-sn-glycero-3-phosphocholine | 1.240363 | 0.020282 | 1.236428 | 602.3029 | 8.874    | Glycerophospholipid metabolism; Choline metabolism in cancer                                                                                                                                                                                                                                                                                                                                          |
| Linoleic acid                      | 1.387929 | 0.034254 | 1.55048  | 279.2322 | 9.6505   | Linoleic acid metabolism; Biosynthesis of unsaturated fatty acids; Metabolic pathways                                                                                                                                                                                                                                                                                                                 |
| 17alpha,21-Dihydroxypregnenolone;  | 1.568237 | 0.021043 | 2.111805 | 347.2201 | 9.6505   | Steroid hormone biosynthesis                                                                                                                                                                                                                                                                                                                                                                          |
| Docosapentaenoic acid              | 1.401332 | 0.037032 | 1.398311 | 329.2478 | 9.7648   | Biosynthesis of unsaturated fatty acids                                                                                                                                                                                                                                                                                                                                                               |
| Dolichyl b-D-glucosyl phosphate    | 1.313004 | 0.032799 | 1.293131 | 465.2241 | 9.850517 | N-Glycan biosynthesis; Metabolic pathways                                                                                                                                                                                                                                                                                                                                                             |

14 dpi POS

|                                  |          |          |          |          |          |                                                                                                                                                                          |
|----------------------------------|----------|----------|----------|----------|----------|--------------------------------------------------------------------------------------------------------------------------------------------------------------------------|
| Salicin                          | 0.759485 | 0.004257 | 2.154016 | 269.104  | 10.35263 | Glycolysis / Gluconeogenesis; Taste transduction                                                                                                                         |
| PE(22:5(4Z,7Z,10Z,13Z,16Z)/16:0) | 0.759897 | 0.039735 | 2.064293 | 766.5381 | 11.66915 | Glycosylphosphatidylinositol(GPI)-anchor biosynthesis; Glycerophospholipid metabolism; Metabolic pathways; Regulation of autophagy; Retrograde endocannabinoid signaling |
| PE(18:4(6Z,9Z,12Z,15Z)/P-18:0)   | 0.725113 | 0.011434 | 2.261101 | 724.5269 | 11.77027 | Glycosylphosphatidylinositol(GPI)-anchor biosynthesis; Glycerophospholipid metabolism; Metabolic pathways; Regulation of autophagy; Retrograde endocannabinoid signaling |
| LysoSM(d18:1)                    | 2.756982 | 0.000252 | 4.973136 | 466.3525 | 7.854633 | Sphingolipid metabolism                                                                                                                                                  |
| L-Palmitoylcarnitine             | 2.067998 | 0.000627 | 4.358549 | 400.3425 | 8.08965  | Fatty acid degradation; Fatty acid metabolism                                                                                                                            |
| Calcitriol                       | 3.382591 | 2.40E-05 | 5.869029 | 450.3577 | 8.132517 | Steroid biosynthesis; Metabolic pathways                                                                                                                                 |
| 27-Deoxy-5b-cyprinol             | 2.392092 | 0.010509 | 4.237968 | 454.389  | 8.524683 | Primary bile acid biosynthesis; Metabolic pathways                                                                                                                       |
| LysoPC(18:2(9Z,12Z))             | 1.332001 | 0.005991 | 1.617473 | 520.3401 | 8.7597   | Glycerophospholipid metabolism; Choline metabolism in cancer                                                                                                             |
| 2-Arachidonylglycerol            | 1.789272 | 0.021758 | 3.150968 | 401.2638 | 9.210067 | Neuroactive ligand-receptor interaction; Retrograde endocannabinoid signaling                                                                                            |
| 2-Methoxyestrone 3-glucuronide   | 1.488657 | 0.007734 | 2.417277 | 459.2046 | 9.273867 | Steroid hormone biosynthesis                                                                                                                                             |

|                                                        |          |          |          |          |          |                                                                                                                                                                                                                |
|--------------------------------------------------------|----------|----------|----------|----------|----------|----------------------------------------------------------------------------------------------------------------------------------------------------------------------------------------------------------------|
| Vitamin A                                              | 1.247661 | 0.044233 | 1.719875 | 287.2351 | 9.28815  | Retinol metabolism; Metabolic pathways; Vitamin digestion and absorption                                                                                                                                       |
| 5a-Cholesta-7,24-dien-3b-ol                            | 0.751589 | 0.010887 | 1.151147 | 385.3466 | 9.6536   | Steroid biosynthesis; Metabolic pathways                                                                                                                                                                       |
| <b>21 dpi NEG</b>                                      |          |          |          |          |          |                                                                                                                                                                                                                |
| Beta-D-Fructose 6-phosphate                            | 2.982175 | 0.001827 | 2.615302 | 259.0222 | 0.633333 | Glycolysis / Gluconeogenesis; Pentose phosphate pathway; Fructose and mannose metabolism; Amino sugar and nucleotide sugar metabolism; Metabolic pathways; Carbon metabolism; Biosynthesis of amino acids      |
| Xanthine                                               | 1.564588 | 0.029563 | 1.518773 | 151.0249 | 0.76835  | Purine metabolism; Caffeine metabolism; Metabolic pathways                                                                                                                                                     |
| 3alpha,7alpha,12alpha-Trihydroxy-5beta-cholestan-26-al | 1.615534 | 0.041478 | 1.859227 | 433.3321 | 10.18555 | Primary bile acid biosynthesis; Metabolic pathways                                                                                                                                                             |
| PC(18:4(6Z,9Z,12Z,15Z)/P-18:1(11Z))                    | 0.141297 | 0.001609 | 4.213948 | 798.5254 | 10.30628 | Glycerophospholipid metabolism; Arachidonic acid metabolism; Linoleic acid metabolism; alpha-Linolenic acid metabolism; Metabolic pathways; Retrograde endocannabinoid signaling; Choline metabolism in cancer |
| Dermatan                                               | 1.205861 | 0.022492 | 1.097477 | 551.1052 | 10.34913 | Glycosaminoglycan degradation; Metabolic pathways; Proteoglycans in cancer                                                                                                                                     |

|                                                         |          |          |          |          |          |                                                                                                                                                                                                                         |
|---------------------------------------------------------|----------|----------|----------|----------|----------|-------------------------------------------------------------------------------------------------------------------------------------------------------------------------------------------------------------------------|
| PE(22:6(4Z,7Z,10Z,13Z,16Z,19Z)/22:5(4Z,7Z,10Z,13Z,16Z)) | 0.356982 | 0.013213 | 2.883902 | 836.5249 | 10.36343 | Glycosylphosphatidylinositol(GPI)-anchor biosynthesis;<br>Glycerophospholipid metabolism;<br>Metabolic pathways; Regulation of autophagy; Retrograde endocannabinoid signaling                                          |
| PC(18:2(9Z,12Z)/20:3(8Z,11Z,14Z))                       | 0.205772 | 0.008205 | 3.213622 | 842.5494 | 10.52058 | Glycerophospholipid metabolism;<br>Arachidonic acid metabolism;<br>Linoleic acid metabolism; alpha-Linolenic acid metabolism;<br>Metabolic pathways; Retrograde endocannabinoid signaling; Choline metabolism in cancer |
| PC(18:1(9Z)/14:1(9Z))                                   | 0.192117 | 0.001763 | 3.433333 | 764.5011 | 10.71273 | Glycerophospholipid metabolism;<br>Arachidonic acid metabolism;<br>Linoleic acid metabolism; alpha-Linolenic acid metabolism;<br>Metabolic pathways; Retrograde endocannabinoid signaling; Choline metabolism in cancer |
| PC(18:4(6Z,9Z,12Z,15Z)/22:1(13Z))                       | 0.216445 | 0.002483 | 3.452981 | 870.5855 | 10.88418 | Glycerophospholipid metabolism;<br>Arachidonic acid metabolism;<br>Linoleic acid metabolism; alpha-Linolenic acid metabolism;<br>Metabolic pathways; Retrograde endocannabinoid signaling; Choline metabolism in cancer |

|                                                   |          |          |          |          |          |                                                                                                                                                                                          |
|---------------------------------------------------|----------|----------|----------|----------|----------|------------------------------------------------------------------------------------------------------------------------------------------------------------------------------------------|
| PE(20:5(5Z,8Z,11Z,14Z,17Z)/16:0)                  | 1.560694 | 0.038885 | 1.439676 | 736.4946 | 11.2335  | Glycosylphosphatidylinositol(GPI)-<br>anchor biosynthesis;<br>Glycerophospholipid metabolism;<br>Metabolic pathways; Regulation of<br>autophagy; Retrograde<br>endocannabinoid signaling |
| PE(20:4(8Z,11Z,14Z,17Z)/22:5(7Z,10Z,13Z,16Z,19Z)) | 1.550398 | 0.021245 | 1.745249 | 812.5266 | 11.43995 | Glycosylphosphatidylinositol(GPI)-<br>anchor biosynthesis;<br>Glycerophospholipid metabolism;<br>Metabolic pathways; Regulation of<br>autophagy; Retrograde<br>endocannabinoid signaling |
| PE(20:4(8Z,11Z,14Z,17Z)/16:0)                     | 1.654044 | 0.018951 | 1.723681 | 738.5095 | 11.55423 | Glycosylphosphatidylinositol(GPI)-<br>anchor biosynthesis;<br>Glycerophospholipid metabolism;<br>Metabolic pathways; Regulation of<br>autophagy; Retrograde<br>endocannabinoid signaling |
| PE(16:0/18:2(9Z,12Z))                             | 1.588417 | 0.00634  | 1.747393 | 714.51   | 11.5828  | Glycosylphosphatidylinositol(GPI)-<br>anchor biosynthesis;<br>Glycerophospholipid metabolism;<br>Metabolic pathways; Regulation of<br>autophagy; Retrograde<br>endocannabinoid signaling |
| PE(20:3(5Z,8Z,11Z)/16:0)                          | 1.40368  | 0.030547 | 1.416828 | 740.525  | 11.68925 | Glycosylphosphatidylinositol(GPI)-<br>anchor biosynthesis;<br>Glycerophospholipid metabolism;                                                                                            |



|                              |          |          |          |          |          |                                                                                                                                                                                                                   |
|------------------------------|----------|----------|----------|----------|----------|-------------------------------------------------------------------------------------------------------------------------------------------------------------------------------------------------------------------|
| PE(16:0/18:4(6Z,9Z,12Z,15Z)) | 1.256173 | 0.012089 | 1.042306 | 746.4489 | 11.71782 | Metabolic pathways; Regulation of autophagy; Retrograde endocannabinoid signaling<br>Glycosylphosphatidylinositol(GPI)-anchor biosynthesis;<br>Glycerophospholipid metabolism;                                    |
| PC(16:0/15:0)                | 1.531811 | 0.006452 | 1.0216   | 718.54   | 11.78925 | Metabolic pathways; Regulation of autophagy; Retrograde endocannabinoid signaling<br>Glycerophospholipid metabolism; Arachidonic acid metabolism; Linoleic acid metabolism; alpha-Linolenic acid metabolism;      |
| PC(15:0/18:2(9Z,12Z))        | 1.487998 | 0.013967 | 1.395747 | 742.5411 | 12.01012 | Metabolic pathways; Retrograde endocannabinoid signaling; Choline metabolism in cancer<br>Glycerophospholipid metabolism; Arachidonic acid metabolism; Linoleic acid metabolism; alpha-Linolenic acid metabolism; |
| L-Homophenylalanine          | 1.201077 | 0.006145 | 1.173437 | 178.0865 | 3.384967 | Metabolic pathways; Retrograde endocannabinoid signaling; Choline metabolism in cancer<br>Phenylalanine, tyrosine and tryptophan biosynthesis; 2-Oxocarboxylic acid metabolism                                    |
| Galactosylsphingosine        | 4.772794 | 1.72E-05 | 4.211398 | 460.3277 | 7.768917 | Sphingolipid metabolism                                                                                                                                                                                           |

|                      |          |          |          |          |          |                                                                                                                                                                                                                                                                                                                                                                                                                                                                                                                                                                              |
|----------------------|----------|----------|----------|----------|----------|------------------------------------------------------------------------------------------------------------------------------------------------------------------------------------------------------------------------------------------------------------------------------------------------------------------------------------------------------------------------------------------------------------------------------------------------------------------------------------------------------------------------------------------------------------------------------|
| Arachidonate         | 2.572414 | 0.000503 | 3.220142 | 303.2325 | 8.003933 | Arachidonic acid metabolism;<br>Linoleic acid metabolism;<br>Biosynthesis of unsaturated fatty acids; Metabolic pathways; Vascular smooth muscle contraction; Platelet activation; Fc epsilon RI signaling pathway; Fc gamma R-mediated phagocytosis; Retrograde endocannabinoid signaling; Serotonergic synapse; Long-term depression; Inflammatory mediator regulation of TRP channels; GnRH signaling pathway; Ovarian steroidogenesis; Oxytocin signaling pathway; Regulation of lipolysis in adipocytes; Aldosterone synthesis and secretion; Leishmaniasis; Amoebiasis |
| Docosahexaenoic acid | 2.034204 | 0.005471 | 2.411878 | 327.23   | 8.003933 | Biosynthesis of unsaturated fatty acids                                                                                                                                                                                                                                                                                                                                                                                                                                                                                                                                      |
| Palmitic acid        | 2.559633 | 0.014517 | 2.998377 | 255.2324 | 8.10395  | Fatty acid biosynthesis; Fatty acid elongation; Fatty acid degradation; Biosynthesis of unsaturated fatty acids; Metabolic pathways; Fatty acid metabolism                                                                                                                                                                                                                                                                                                                                                                                                                   |
| Oleic acid           | 3.618674 | 0.004044 | 3.681572 | 281.2483 | 8.218233 | Fatty acid biosynthesis; Biosynthesis of unsaturated fatty acids                                                                                                                                                                                                                                                                                                                                                                                                                                                                                                             |

|                                      |          |          |          |          |          |                                                                                                                                                                                          |
|--------------------------------------|----------|----------|----------|----------|----------|------------------------------------------------------------------------------------------------------------------------------------------------------------------------------------------|
| LysoPC(16:1(9Z))                     | 0.637513 | 0.003387 | 1.780251 | 492.3102 | 8.951883 | Glycerophospholipid metabolism;<br>Choline metabolism in cancer                                                                                                                          |
| LysoPC(16:0)                         | 1.256671 | 0.011725 | 1.146358 | 530.3052 | 9.066167 | Glycerophospholipid metabolism;<br>Choline metabolism in cancer                                                                                                                          |
| 5-Hydroxyeicosatetraenoate           | 1.888633 | 0.017928 | 1.997717 | 319.2275 | 9.151883 | Arachidonic acid metabolism;<br>Inflammatory mediator regulation of<br>TRP channels                                                                                                      |
| Divinylchlorophyll a                 | 0.751285 | 0.020723 | 1.201267 | 889.5156 | 9.515483 | Porphyrin and chlorophyll<br>metabolism                                                                                                                                                  |
| Stearic acid                         | 1.937012 | 0.012259 | 2.401965 | 283.2631 | 9.55835  | Fatty acid biosynthesis; Biosynthesis<br>of unsaturated fatty acids                                                                                                                      |
| 1-Acyl-sn-glycero-3-phosphocholine   | 0.543907 | 0.006163 | 1.876112 | 606.3297 | 9.693367 | Glycerophospholipid metabolism;<br>Choline metabolism in cancer                                                                                                                          |
| PE(16:1(9Z)/14:1(9Z))                | 0.59636  | 0.003791 | 1.858339 | 694.4255 | 9.836233 | Glycosylphosphatidylinositol(GPI)-<br>anchor biosynthesis;<br>Glycerophospholipid metabolism;<br>Metabolic pathways; Regulation of<br>autophagy; Retrograde<br>endocannabinoid signaling |
| PE(22:5(4Z,7Z,10Z,13Z,16Z)/14:1(9Z)) | 0.293538 | 0.000295 | 3.629551 | 770.4542 | 9.836233 | Glycosylphosphatidylinositol(GPI)-<br>anchor biosynthesis;<br>Glycerophospholipid metabolism;<br>Metabolic pathways; Regulation of<br>autophagy; Retrograde<br>endocannabinoid signaling |
| PC(16:1(9Z)/20:5(5Z,8Z,11Z,14Z,17Z)) | 0.244134 | 0.000167 | 3.668308 | 812.5064 | 9.956967 | Glycerophospholipid metabolism;<br>Arachidonic acid metabolism;                                                                                                                          |

|                                          |          |          |          |          |          |                                                                                                                                                                                                                |
|------------------------------------------|----------|----------|----------|----------|----------|----------------------------------------------------------------------------------------------------------------------------------------------------------------------------------------------------------------|
| 3-O-Sulfogalactosylceramide (d18:1/16:0) | 0.441758 | 0.03554  | 2.472167 | 778.5211 | 9.985533 | Linoleic acid metabolism; alpha-Linolenic acid metabolism; Metabolic pathways; Retrograde endocannabinoid signaling; Choline metabolism in cancer<br>Sphingolipid metabolism; Metabolic pathways               |
| <b>21 dpi POS</b>                        |          |          |          |          |          |                                                                                                                                                                                                                |
| 5a-Cholesta-7,24-dien-3b-ol              | 0.572883 | 0.001706 | 3.028826 | 385.3447 | 10.2319  | Steroid biosynthesis; Metabolic pathways                                                                                                                                                                       |
| Ubiquinone-8                             | 0.69587  | 0.002134 | 2.809335 | 765.5171 | 10.35263 | Ubiquinone and other terpenoid-quinone biosynthesis                                                                                                                                                            |
| PC(18:3(9Z,12Z,15Z)/18:2(9Z,12Z))        | 0.59141  | 0.004071 | 2.974271 | 802.5319 | 10.35263 | Glycerophospholipid metabolism; Arachidonic acid metabolism; Linoleic acid metabolism; alpha-Linolenic acid metabolism; Metabolic pathways; Retrograde endocannabinoid signaling; Choline metabolism in cancer |
| Calcidiol                                | 0.39057  | 0.001459 | 3.782512 | 401.3412 | 10.46718 | Steroid biosynthesis; Metabolic pathways; Tuberculosis                                                                                                                                                         |
| PE(20:5(5Z,8Z,11Z,14Z,17Z)/22:1(13Z))    | 0.439191 | 0.001948 | 3.558609 | 842.5679 | 10.52432 | Glycosylphosphatidylinositol(GPI)-anchor biosynthesis; Glycerophospholipid metabolism; Metabolic pathways; Regulation of autophagy; Retrograde endocannabinoid signaling                                       |

|                                       |          |          |          |          |          |                                                                                                                                                                        |
|---------------------------------------|----------|----------|----------|----------|----------|------------------------------------------------------------------------------------------------------------------------------------------------------------------------|
| PS(18:0/22:5(7Z,10Z,13Z,16Z,19Z))     | 0.573796 | 0.005104 | 2.836821 | 820.5478 | 10.59575 | Glycine, serine and threonine metabolism; Glycerophospholipid metabolism; Metabolic pathways; Leishmaniasis; Amoebiasis; Systemic lupus erythematosus                  |
| 25-Hydroxyvitamin D3                  | 0.693377 | 0.003268 | 2.411821 | 423.3258 | 10.6279  | Steroid biosynthesis; Metabolic pathways; Tuberculosis                                                                                                                 |
| 17alpha,20alpha-Dihydroxycholesterol; | 0.664756 | 0.001248 | 2.643533 | 401.3408 | 10.64505 | teroid hormone biosynthesis                                                                                                                                            |
| PS(18:0/20:0)                         | 0.385932 | 0.002002 | 3.752662 | 842.5805 | 10.67363 | Glycine, serine and threonine metabolism; Glycerophospholipid metabolism; Metabolic pathways; Leishmaniasis; Amoebiasis; Systemic lupus erythematosus                  |
| Vitamin D3                            | 0.529468 | 0.000949 | 3.110825 | 385.3463 | 10.8165  | Steroid biosynthesis; Metabolic pathways; Vitamin digestion and absorption; Rheumatoid arthritis                                                                       |
| 20alpha-Hydroxycholesterol            | 0.62723  | 0.002886 | 2.561981 | 425.339  | 10.8165  | Steroid hormone biosynthesis; Metabolic pathways                                                                                                                       |
| SM(d18:0/16:1(9Z))                    | 2.2955   | 0.004374 | 3.878188 | 703.5744 | 11.29447 | Sphingolipid metabolism; Metabolic pathways; Sphingolipid signaling pathway                                                                                            |
| Ceramide (d18:1/16:0)                 | 1.832374 | 0.002591 | 2.635071 | 520.5092 | 11.60538 | Sphingolipid metabolism; Metabolic pathways; Sphingolipid signaling pathway; Neurotrophin signaling pathway; Adipocytokine signaling pathway; Insulin resistance; AGE- |

|                                            |          |          |          |          |          |                                                                                                                                                                                                  |
|--------------------------------------------|----------|----------|----------|----------|----------|--------------------------------------------------------------------------------------------------------------------------------------------------------------------------------------------------|
| Cholesteryl acetate                        | 4.762766 | 0.002405 | 5.537349 | 429.3732 | 11.71268 | RAGE signaling pathway in diabetic complications; Leishmaniasis<br>Steroid biosynthesis; Ovarian steroidogenesis; Fat digestion and absorption; Bile secretion; Vitamin digestion and absorption |
| SM(d18:0/18:1(11Z))                        | 2.068757 | 0.005533 | 3.580058 | 731.6066 | 11.75587 | Sphingolipid metabolism; Metabolic pathways; Sphingolipid signaling pathway                                                                                                                      |
| PE(18:3(9Z,12Z,15Z)/P-18:1(9Z))            | 1.324946 | 0.00901  | 1.780657 | 724.5269 | 11.77027 | Glycosylphosphatidylinositol(GPI)-anchor biosynthesis;<br>Glycerophospholipid metabolism; Metabolic pathways; Regulation of autophagy; Retrograde endocannabinoid signaling                      |
| PE(22:6(4Z,7Z,10Z,13Z,16Z,19Z)/P-18:1(9Z)) | 1.221288 | 0.04759  | 1.288592 | 774.5393 | 11.82825 | Glycosylphosphatidylinositol(GPI)-anchor biosynthesis;<br>Glycerophospholipid metabolism; Metabolic pathways; Regulation of autophagy; Retrograde endocannabinoid signaling                      |
| PE(18:0/20:4(5Z,8Z,11Z,14Z))               | 1.267038 | 0.039195 | 1.889707 | 750.5431 | 11.87368 | Glycosylphosphatidylinositol(GPI)-anchor biosynthesis;<br>Glycerophospholipid metabolism; Metabolic pathways; Regulation of autophagy; Retrograde endocannabinoid signaling                      |

|                                                          |          |          |          |          |          |                                                                       |
|----------------------------------------------------------|----------|----------|----------|----------|----------|-----------------------------------------------------------------------|
| Toluene                                                  | 0.813193 | 0.023413 | 1.824521 | 93.07007 | 5.879467 | Metabolic pathways                                                    |
| 2'-Deamino-2'-hydroxyparomamine;                         | 0.64466  | 0.016577 | 2.02378  | 307.1517 | 6.606667 | Butirosin and neomycin biosynthesis                                   |
| Pravastatin                                              | 0.733906 | 0.049423 | 1.620861 | 407.2386 | 7.113133 | Bile secretion                                                        |
| Traumatin                                                | 0.713673 | 0.001754 | 2.676718 | 195.1372 | 7.19885  | alpha-Linolenic acid metabolism                                       |
| S-(2-Hydroxyethyl)-N-acetyl-L-cysteine;                  | 0.800495 | 0.00539  | 1.666194 | 208.0629 | 7.19885  | Metabolism of xenobiotics by cytochrome P450                          |
| 2-Hydroxy-6-oxo-6-(2-hydroxyphenoxy)-hexa-2,4-dienoate;  | 0.632226 | 0.000212 | 2.947256 | 251.0561 | 7.202433 | Metabolic pathways                                                    |
| Xanthoxin                                                | 0.816202 | 0.005225 | 1.730667 | 251.1624 | 7.597467 | Metabolic pathways                                                    |
| Neomycin                                                 | 0.650174 | 0.043146 | 2.316403 | 597.3113 | 7.61175  | Butirosin and neomycin biosynthesis                                   |
| 2-(3'-Methylthio)propylmalic acid                        | 1.407361 | 0.001055 | 2.577576 | 261.0211 | 7.72605  | 2-Oxocarboxylic acid metabolism                                       |
| FMNH2                                                    | 1.322392 | 0.030885 | 1.73693  | 441.1209 | 7.72605  | Riboflavin metabolism; Metabolic pathways                             |
| Cortolone                                                | 0.581532 | 0.025143 | 2.313912 | 389.2305 | 7.7832   | Steroid hormone biosynthesis                                          |
| Sphingosyl-phosphocholine                                | 3.251218 | 0.000257 | 5.168744 | 466.3525 | 7.854633 | Sphingolipid metabolism                                               |
| Prostaglandin B2                                         | 0.533646 | 0.027738 | 2.334988 | 357.2037 | 7.886767 | Arachidonic acid metabolism; Metabolic pathways; Serotonergic synapse |
| 11b,21-Dihydroxy-3,20-oxo-5b-pregnan-18-al               | 0.439009 | 0.03179  | 2.636187 | 387.2153 | 7.9325   | Steroid hormone biosynthesis                                          |
| 11b-Hydroxyprogesterone                                  | 0.607113 | 0.019871 | 2.153665 | 355.1875 | 7.946783 | Steroid hormone biosynthesis                                          |
| Estriol                                                  | 0.655182 | 0.00283  | 2.861777 | 289.1803 | 7.961067 | Steroid hormone biosynthesis; Metabolic pathways                      |
| (9Z,11E,15Z)-(13S)-Hydroperoxyoctadeca-9,11,15-trienoate | 0.484162 | 0.019553 | 2.674823 | 333.2042 | 7.961067 | alpha-Linolenic acid metabolism; Metabolic pathways                   |
| Tetrahydrocortisol                                       | 0.546558 | 0.046217 | 2.296288 | 389.2302 | 8.003933 | Steroid hormone biosynthesis                                          |
| L-Palmitoylcarnitine                                     | 2.440759 | 9.37E-05 | 4.800594 | 400.3425 | 8.08965  | Fatty acid degradation; Fatty acid metabolism                         |

|                                                                                    |          |          |          |          |          |                                                                                       |
|------------------------------------------------------------------------------------|----------|----------|----------|----------|----------|---------------------------------------------------------------------------------------|
| Calcitriol                                                                         | 2.611776 | 0.012727 | 3.84392  | 450.3577 | 8.132517 | Steroid biosynthesis; Metabolic pathways                                              |
| 2-Arachidonoylglycerol                                                             | 0.447526 | 0.030793 | 2.841682 | 396.3098 | 8.381817 | Neuroactive ligand-receptor interaction; Retrograde endocannabinoid signaling         |
| 9(S)-HOT; (9S)-(10E,12Z,15Z)-9-Hydroxyoctadecatri-10,12,15-enoic acid; 9(S)-HOTrE; | 1.405098 | 0.005728 | 2.722594 | 277.2153 | 8.481817 | alpha-Linolenic acid metabolism                                                       |
| 13-OxoODE                                                                          | 2.104412 | 0.000461 | 3.73962  | 317.2083 | 8.481817 | Linoleic acid metabolism                                                              |
| 15-KETE                                                                            | 0.746043 | 0.006826 | 1.741688 | 301.2158 | 8.524683 | Arachidonic acid metabolism                                                           |
| 27-Deoxy-5b-cyprinol                                                               | 3.992    | 0.000703 | 6.097428 | 454.389  | 8.524683 | Primary bile acid biosynthesis; Metabolic pathways                                    |
| Tetrahydrocorticosterone                                                           | 0.600269 | 0.037094 | 2.141009 | 373.2346 | 8.538967 | Steroid hormone biosynthesis                                                          |
| LysoPC(15:0)                                                                       | 0.813384 | 0.008698 | 1.502084 | 482.3244 | 8.802567 | Glycerophospholipid metabolism; Choline metabolism in cancer                          |
| LysoPC(18:2(9Z,12Z))                                                               | 0.714505 | 0.011555 | 2.016584 | 520.3399 | 8.888283 | Glycerophospholipid metabolism; Choline metabolism in cancer                          |
| LysoPC(22:4(7Z,10Z,13Z,16Z))                                                       | 0.788134 | 0.027996 | 1.402678 | 568.3403 | 8.888283 | Glycerophospholipid metabolism; Choline metabolism in cancer                          |
| Androstan-3alpha,17beta-diol                                                       | 1.329948 | 0.008666 | 2.095944 | 293.2467 | 8.923617 | Steroid hormone biosynthesis                                                          |
| Linoleic acid                                                                      | 0.797409 | 0.011512 | 1.69308  | 298.2742 | 8.923617 | Linoleic acid metabolism; Biosynthesis of unsaturated fatty acids; Metabolic pathways |
| Tetrahydrodeoxycorticosterone                                                      | 1.835858 | 0.014289 | 3.257091 | 357.2399 | 9.02365  | Steroid hormone biosynthesis                                                          |
| Tryptophol                                                                         | 0.820555 | 0.043699 | 1.373631 | 184.0737 | 9.195717 | Tryptophan metabolism                                                                 |
| Calcifediol anhydrous                                                              | 0.549357 | 0.008247 | 2.957244 | 383.3292 | 9.210067 | Steroid biosynthesis; Metabolic pathways; Tuberculosis                                |



|                                           |          |          |          |          |          |                                                                                                                                                                                                                                   |
|-------------------------------------------|----------|----------|----------|----------|----------|-----------------------------------------------------------------------------------------------------------------------------------------------------------------------------------------------------------------------------------|
| PC(22:5(4Z,7Z,10Z,13Z,16Z)/18:2(9Z,12Z))  | 0.533907 | 0.009299 | 3.107997 | 870.5337 | 9.6101   | Glycerophospholipid metabolism;<br>Arachidonic acid metabolism;<br>Linoleic acid metabolism; alpha-<br>Linolenic acid metabolism;<br>Metabolic pathways; Retrograde<br>endocannabinoid signaling; Choline<br>metabolism in cancer |
| 7alpha-Hydroxy-3-oxo-4-cholestenoate;     | 0.523604 | 0.00035  | 3.29407  | 431.3153 | 9.839317 | Primary bile acid biosynthesis                                                                                                                                                                                                    |
| PC(20:5(5Z,8Z,11Z,14Z,17Z)/20:2(11Z,14Z)) | 0.494452 | 0.002961 | 3.263398 | 870.5388 | 9.839317 | Glycerophospholipid metabolism;<br>Arachidonic acid metabolism;<br>Linoleic acid metabolism; alpha-<br>Linolenic acid metabolism;<br>Metabolic pathways; Retrograde<br>endocannabinoid signaling; Choline<br>metabolism in cancer |
| Bacteriochlorophyll a                     | 0.640671 | 0.020365 | 2.748601 | 911.5536 | 9.839317 | Porphyrin and chlorophyll<br>metabolism                                                                                                                                                                                           |
| 3-O-Sulfogalactosylceramide (d18:1/18:0)  | 0.513492 | 0.002055 | 3.356449 | 846.5207 | 9.853683 | Sphingolipid metabolism; Metabolic<br>pathways                                                                                                                                                                                    |
| PC(16:0/22:5(4Z,7Z,10Z,13Z,16Z))          | 0.458292 | 0.000616 | 3.569629 | 846.5407 | 9.960233 | Glycerophospholipid metabolism;<br>Arachidonic acid metabolism;<br>Linoleic acid metabolism; alpha-<br>Linolenic acid metabolism;<br>Metabolic pathways; Retrograde<br>endocannabinoid signaling; Choline<br>metabolism in cancer |

|                                      |          |          |          |          |          |                                                                                                                                                       |
|--------------------------------------|----------|----------|----------|----------|----------|-------------------------------------------------------------------------------------------------------------------------------------------------------|
| PS(18:0/22:6(4Z,7Z,10Z,13Z,16Z,19Z)) | 0.597889 | 0.026969 | 2.680167 | 858.5318 | 9.839317 | Glycine, serine and threonine metabolism; Glycerophospholipid metabolism; Metabolic pathways; Leishmaniasis; Amoebiasis; Systemic lupus erythematosus |
| Fexofenadine                         | 0.573118 | 0.027832 | 2.890652 | 524.279  | 7.918217 | Bile secretion                                                                                                                                        |

---

\*POS and NEG indicate positive and negative ion mode, respectively; PS: phosphatidylserine; PC: phosphatidylcholine; PE: phosphatidylethanolamine; 13-OxoODE: (9Z,11E)-13-oxooctadeca-9,11-dienoic acid; 15-KETE: (5Z,8Z,11Z,13E)-15-oxoicosa-5,8,11,13-tetraenoic acid; SM, sphingomyelin; FMNH2: {[ (2R,3S,4S)-5- {7,8-dimethyl-2,4-dioxo-1H,2H,3H,4H,5H,10H-benzo[g]pteridin-10-yl} -2,3,4-trihydroxypentyl]oxy} phosphonic acid.
